# Supplementary material for: Synthesis and characterization of highly ordered bifunctional aromatic periodic mesoporous organosilicas with different pore sizes
Source: Royal Society of Chemistry journal article supplement (doi:10.1039/b603458f), 2006-01-01
Supplement: b603458f.pdf [file b603458f.pdf]

**SUPPORTING INFORMATION:**

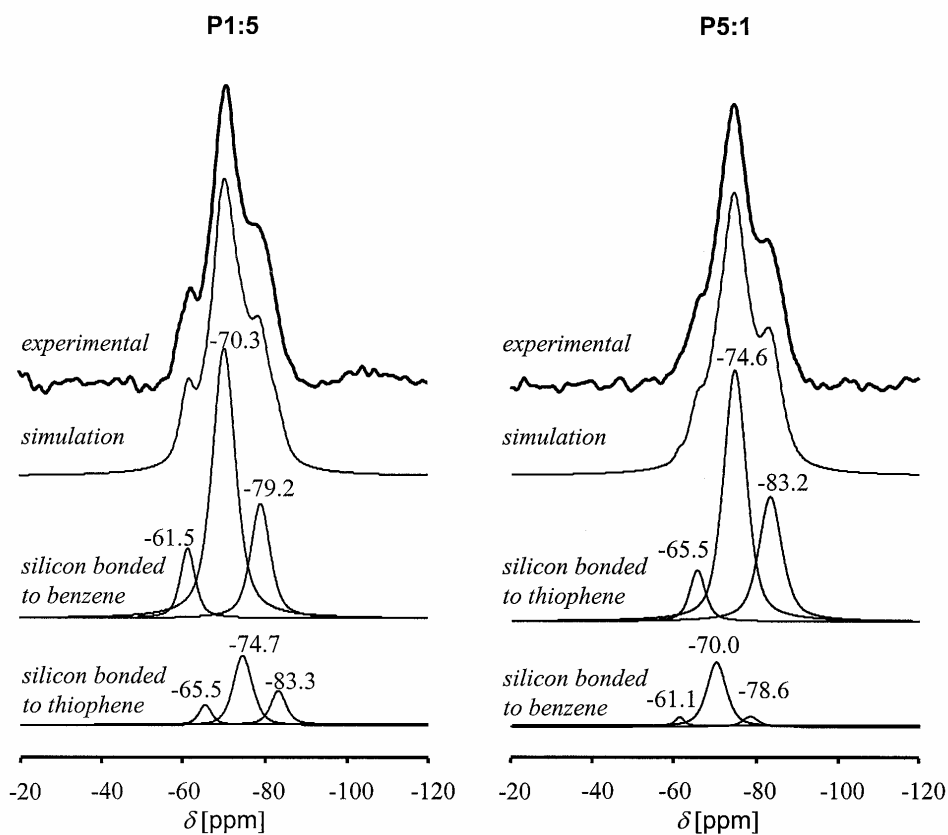

**Figure S1:** Simulation of the  $^{29}\text{Si}$  MAS NMR spectra of the bifunctional PMO materials P1:5 (left) and P5:1 (right) according to Figure 7.
